# Supplementary material
Source: PubMed Central journal article supplement (PMC2922545)
Supplement: 1009170107_pnas.201009170SI.pdf [file 1009170107_pnas.201009170SI.pdf]

# Supporting Information

Zhao et al. 10.1073/pnas.1009170107

## SI Materials and Methods

**Constructs for Transfection Studies.** SND1 (At1g32770), MYB46 (At5g12870), and MYB58 (At1g16490) were cloned into the vector p2GW7 (1). The fragment (1-3414) of the vector pPGWL7 (1), which contains the firefly luciferase ORF was transferred to p2GW7 to generate a small high-copy vector with the firefly luciferase sequence. The promoters ( $\approx$ 1-kb regions) of F5H, C4H, COMT, and CCoAOMT were cloned into pENTR vector and then switched into the modified vector. The primers used for promoter cloning were: ProF5H-Forward 5'-CACCGATTCTCACATTTGTTTTATATATATG-3, ProF5H-Reverse 5'-GTTAACCTTGTTGTTTCTATTTTTGGTTTC-3; ProC4H-Forward 5'-CACCTCTAATTGAATAGCATGTTACCCGGTCCAACC-3, ProC4H-Reverse 5'-TGTTGAGTGTGTTTTTGTGTTTTGGGTAATGAAA-3; ProCOMT-Forward 5'-CACCGGTCACGTACATTTTGGTTGTGTGACCATATTTTTC-3, ProCOMT-Reverse 5'-GGT-

TGTGATTGATGAGGTTTTTGAGATTGTAGTGGTG-3; and ProCCoAOMT-Forward 5'-CACCGCATCAAAAACATGTCAAAACACTAGCAATTCATC-3, ProCCoAOMT-Reverse 5'-TGTTAAATCTTGGGAATGTTTTGCTTCTTTTTCTG-3.

**F5H Promoter Fragments for Competiton EMSA Assays.** P1 to P6 are 50-bp fragments from -349 to -100 of the F5H promoter region, with 10-bp overlaps between each other. Their sequences are:

- P1, 5'-atcaagcatatcaaacgtgtgtaaatatctattctatctctcaaatctca-3';
- P2, 5'-ctcaaatctcaatgttacgTTTTTctcctcaaatgctttattagttgcgt-3';
- P3, 5'-ttagttgcgtccacttgcaatataataatctattgatacatatTTTT-3';
- P4, (5'-catatTTTTcttaaccaagtttacactctcaagcaactattatata-3';
- P5, 5'-tattatataagaccataatataatctcacaattcagcaacccttagagt-3';
- P6, 5'-acccttagagttgcaatctcacatcaactctcatccaacaacaaca-3').

1. Karimi M, Inzé D, Depicker A (2002) GATEWAY vectors for Agrobacterium-mediated plant transformation. *Trends Plant Sci* 7:193–195.

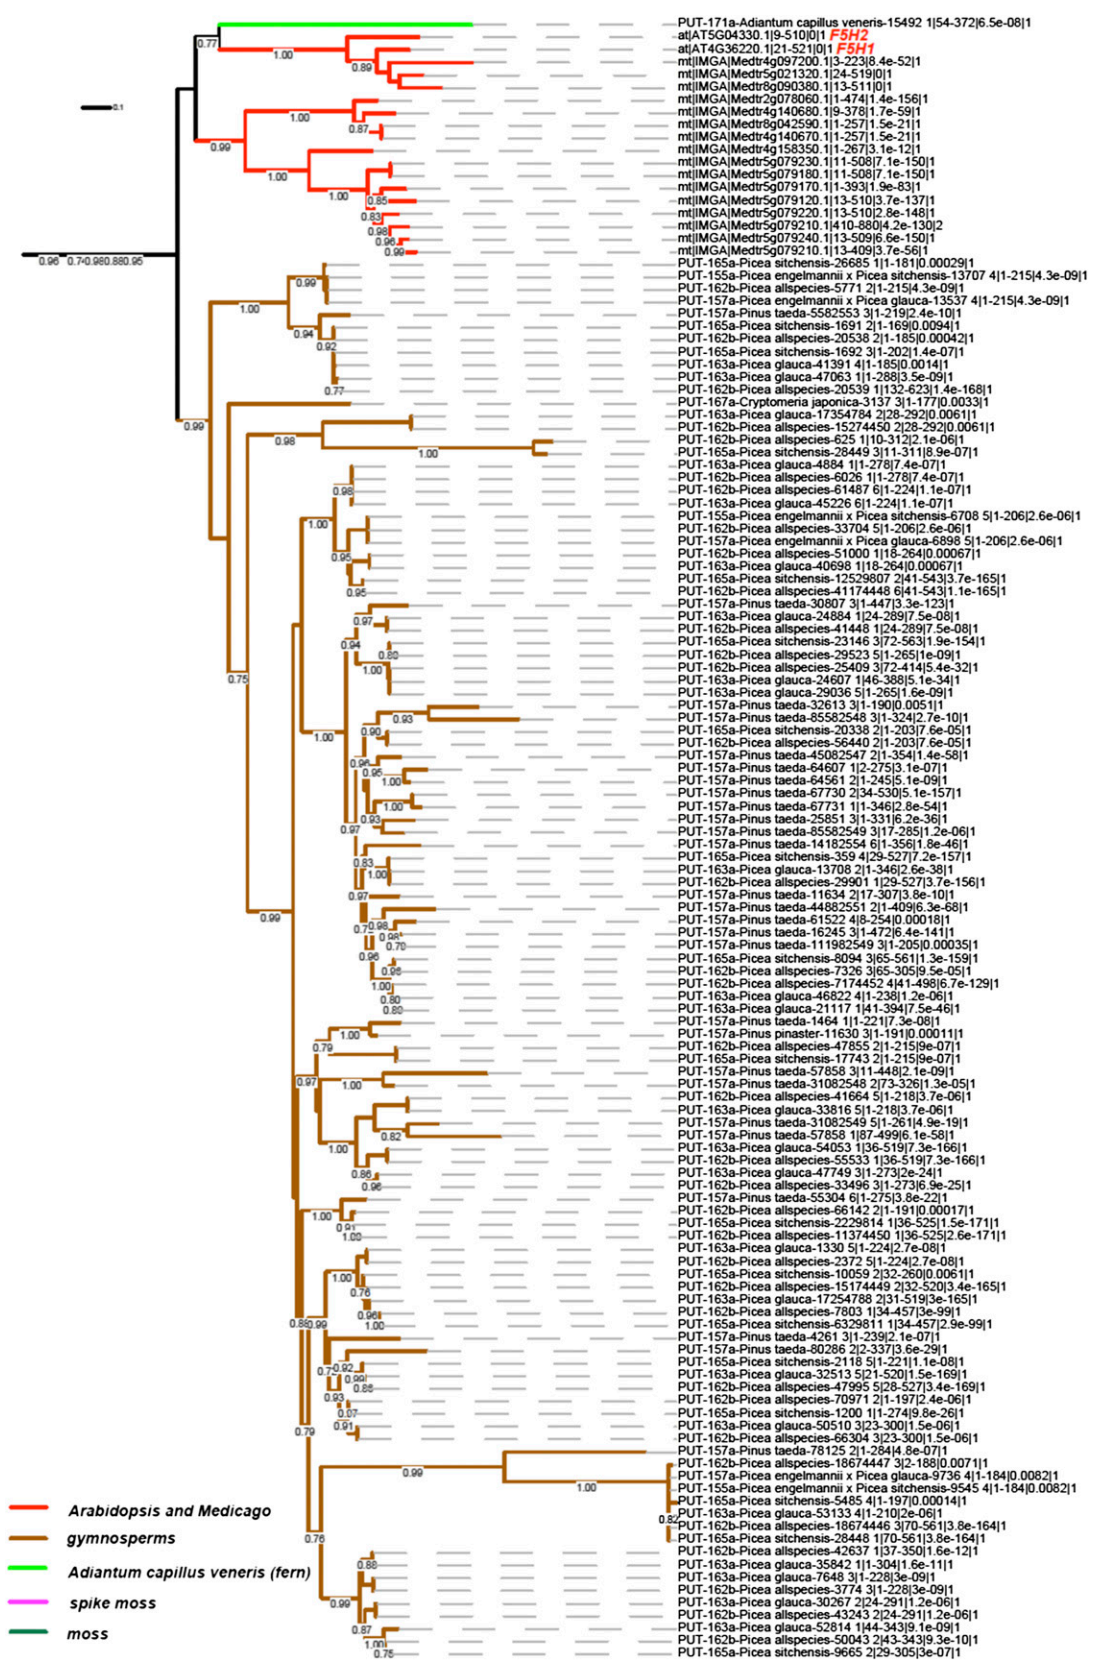

Fig. S1. Subclade containing *Arabidopsis* F5H proteins. This subclade is taken from Fig. 6A and shows the evolutionary orthologs of *Arabidopsis* F5H proteins in other organisms.

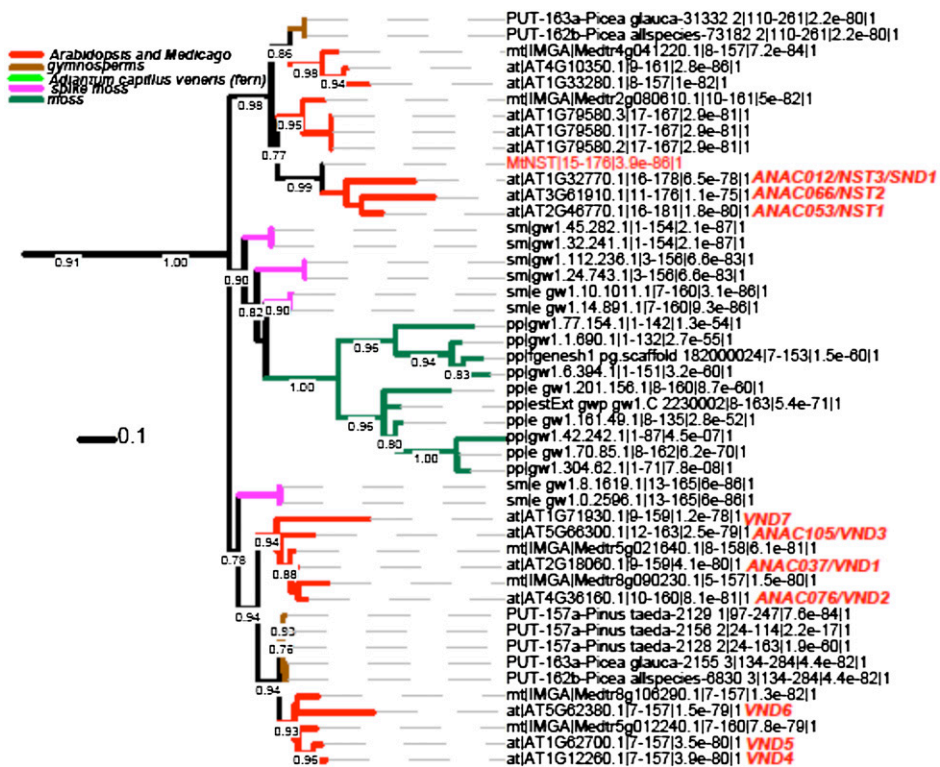

Fig. S2. Subclade containing *Arabidopsis* NAC proteins. This subclade is taken from Fig. 6B and shows the evolutionary orthologs of *Arabidopsis* NST proteins in other organisms.

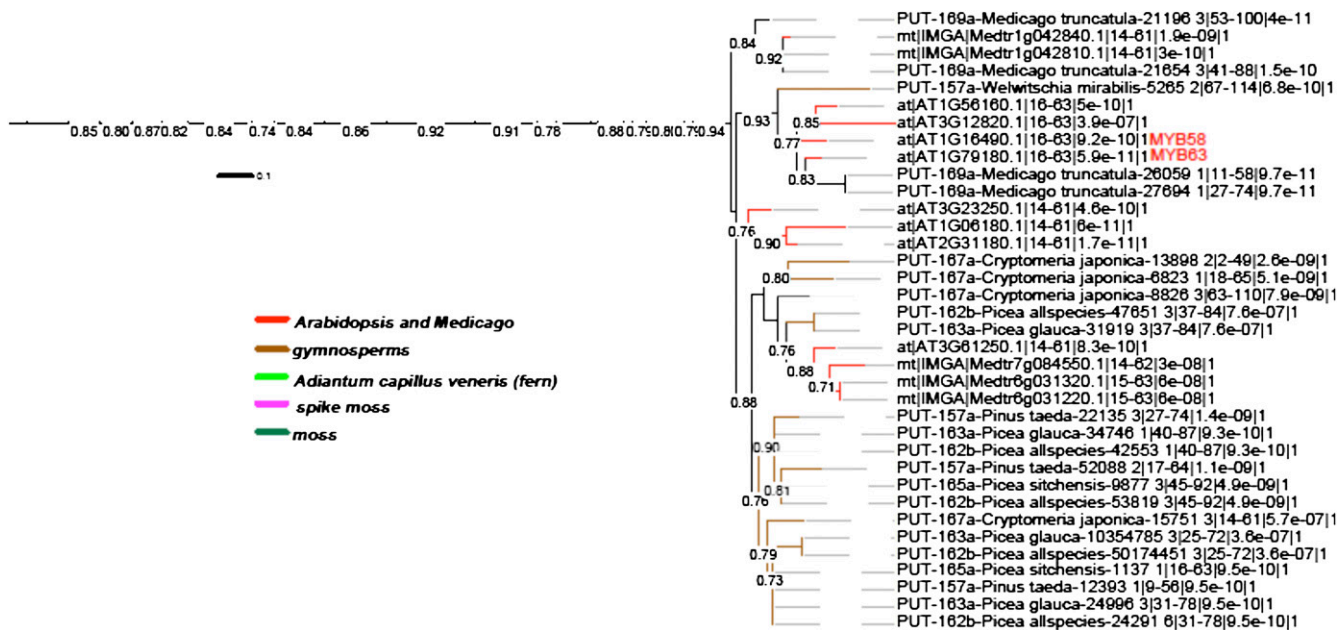

Fig. S3. Subclade containing the N-terminal domain of *Arabidopsis* MYB58 protein. This subclade is taken from Fig. 6C and shows the evolutionary orthologs of *Arabidopsis* MYB58 proteins in other organisms.









**Table S1. The 21 land-plant and algal species used in the phylogenetic analyses**

| Species                                     | Clade                    | No. of UniGenes/ proteins |
|---------------------------------------------|--------------------------|---------------------------|
| <u>Cyanidioschyzon merolae 10D</u>          | Unicellular red algae    | <u>5014</u>               |
| <u>Chlamydomonas reinhardtii</u>            | Chlorophytic green algae | <u>14598</u>              |
| <i>Mesostigma viride</i>                    | Green algae              | 7371                      |
| <i>Marchantia polymorpha</i>                | Liverwort                | 10959                     |
| <u>Physcomitrella patens ssp patens</u>     | Moss                     | <u>35938</u>              |
| <u>Selaginella moellendorffii</u>           | Spike moss               | <u>34697</u>              |
| <i>Adiantum capillus veneris</i>            | Fern                     | 16944                     |
| <i>Cycas rumphii</i>                        | Gymnosperms              | 10901                     |
| <i>Cryptomeria japonica</i>                 | Gymnosperms              | 24299                     |
| <i>Ginkgo biloba</i>                        | Gymnosperms              | 10210                     |
| <i>Picea abies</i>                          | Gymnosperms              | 5184                      |
| <i>Picea allspecies</i>                     | Gymnosperms              | 72011                     |
| <i>Picea engelmannii x Picea glauca</i>     | Gymnosperms              | 13880                     |
| <i>Picea engelmannii x Picea sitchensis</i> | Gymnosperms              | 13880                     |
| <i>Picea glauca</i>                         | Gymnosperms              | 53255                     |
| <i>Picea sitchensis</i>                     | Gymnosperms              | 29178                     |
| <i>Pinus pinaster</i>                       | Gymnosperms              | 12901                     |
| <i>Pinus taeda</i>                          | Gymnosperms              | 77540                     |
| <i>Welwitschia mirabilis</i>                | Gymnosperms              | 6606                      |
| <u>Arabidopsis thaliana</u>                 | Dicot                    | <u>33410</u>              |
| <u>Medicago truncatula</u>                  | Dicot                    | <u>53423</u>              |

Six sequenced plant genomes are underlined; the remainder are EST assemblies taken from plant GDB. Species are ordered from lower plants to higher plants.
